# Supplementary material for: Effects of granular activated carbon and Fe-modified granular activated carbon on anammox process start-up
Source: Royal Society of Chemistry journal article supplement (doi:10.1039/d1ra00384d), 2021-01-01
Supplement: d1ra00384d1.pdf [file d1ra00384d1.pdf]

## Supplementary materials for

### Effects of Granular Activated Carbon and Fe-modified Granular Activated Carbon on Anammox Process Start-up

Guangsong Lu <sup>a</sup>, Yunqian Ma <sup>a, c</sup>, Lihua Zang <sup>a</sup>, Yan Sun <sup>a</sup>, Fei Yu <sup>a, b</sup>, Rong Xue <sup>a, \*</sup>

<sup>a</sup> School of Environmental Science and Engineering, Qilu University of Technology (Shandong Academy of Sciences), Jinan 250353, China.

<sup>b</sup> Key Laboratory of Pulp and Paper Science & Technology of Ministry of Education/Shandong Province, Qilu University of Technology, Jinan, 250353, China.

<sup>c</sup> Beijing Key Laboratory of Ionic Liquids Clean Process, State Key Laboratory of Multiphase Complex Systems, Institute of Process Engineering, Chinese Academy of Sciences, Beijing, 100190, China.

\* Corresponding author: Rong Xue

Tel: +86-531-89631680; Fax: +86-531-89631680; E-mail: xr@qlu.edu.cn

**Table S1**

Composition of synthesis wastewater

| Constituent                          | Concentration (g/L) | Constituent                             | Concentration (g/L)    |
|--------------------------------------|---------------------|-----------------------------------------|------------------------|
| NH <sub>4</sub> Cl                   | — <sup>a</sup>      | MgSO <sub>4</sub> ·7H <sub>2</sub> O    | 0.3                    |
| NaNO <sub>2</sub>                    | — <sup>a</sup>      | KH <sub>2</sub> PO <sub>4</sub>         | 0.027                  |
| KHCO <sub>3</sub>                    | 0.5                 | Trace element solution I <sup>b</sup>   | 1.25ml·L <sup>-1</sup> |
| CaCl <sub>2</sub> ·2H <sub>2</sub> O | 0.18                | Trace elements solution II <sup>c</sup> | 1.25ml·L <sup>-1</sup> |

<sup>a</sup> NH<sub>4</sub><sup>+</sup>-N and NO<sub>2</sub><sup>-</sup>-N concentration adjusted as required.

<sup>b</sup> Trace element solution I: 5g·L<sup>-1</sup> EDTA and 9.14 g·L<sup>-1</sup> FeSO<sub>4</sub>·7H<sub>2</sub>O.

<sup>c</sup> Trace element solution II: 15 g·L<sup>-1</sup> EDTA, 0.014 g·L<sup>-1</sup> H<sub>3</sub>BO<sub>4</sub>, 0.99 g·L<sup>-1</sup> MnCl<sub>2</sub>·4H<sub>2</sub>O, 0.25 g·L<sup>-1</sup> CuSO<sub>4</sub>·5H<sub>2</sub>O, 0.43 g·L<sup>-1</sup> ZnSO<sub>4</sub>·7H<sub>2</sub>O, 0.21 g·L<sup>-1</sup> NiCl<sub>2</sub>·6H<sub>2</sub>O, 0.22 g·L<sup>-1</sup> NaMoO<sub>4</sub>·2H<sub>2</sub>O and 0.24 g·L<sup>-1</sup> CoCl<sub>2</sub>·6H<sub>2</sub>O.

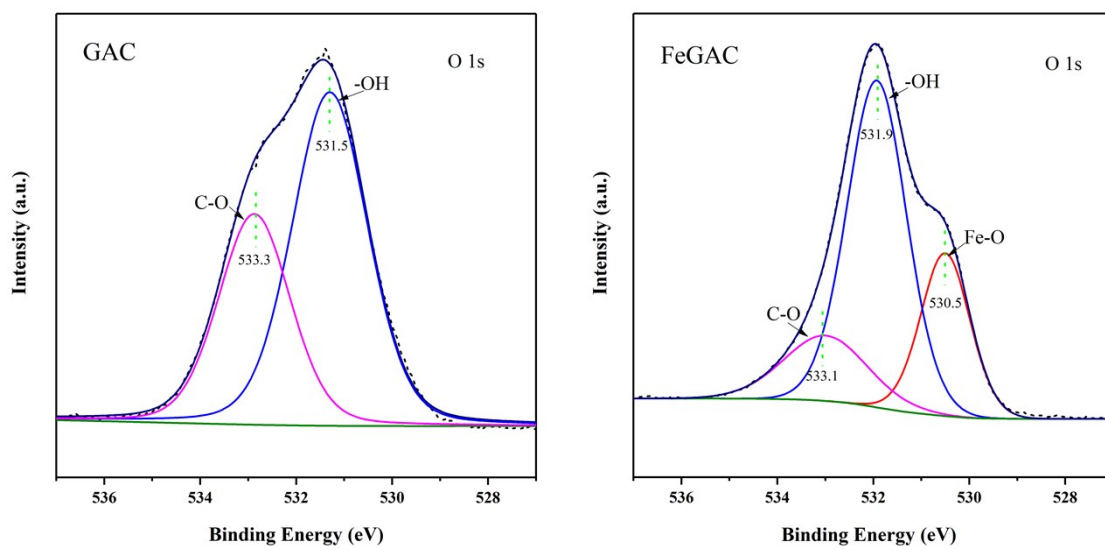

**Fig. S1.** The O1s XPS spectrums of GAC and FeGAC

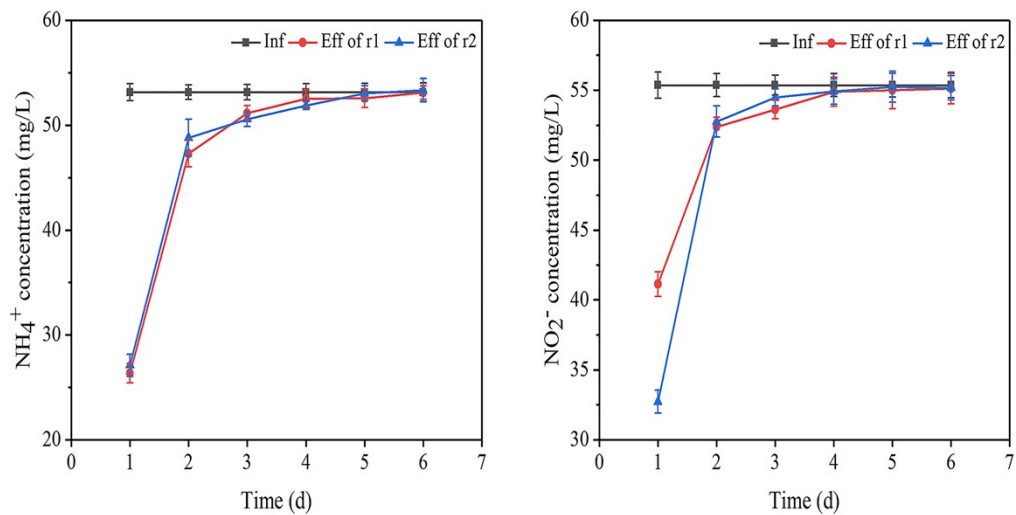

**Fig. S2.**  $\text{NH}_4^+$ -N and  $\text{NO}_2^-$ -N concentration after adsorption. r1: GAC group (without microorganisms); r2: FeGAC group (without microorganisms)
